## Research Article

# Probiotics combined with aminosalicyclic acid affiliates remission of ulcerative colitis: a meta-analysis of randomized controlled trial

Lijun Peng<sup>1</sup>, Yan Zhong<sup>2</sup>, Aiping Wang<sup>3</sup> and Zhisheng Jiang<sup>4</sup>

<sup>1</sup>Medical Record Statistics Office and Library, The Pediatric Academy of University of South China (Hunan Children's Hospital), Changsha, Hunan Province 410007, People's Republic of China; <sup>2</sup>Health Care Institute of Hunan Children's Hospital, Changsha, Hunan Province 410007, People's Republic of China; <sup>3</sup>Institute of Clinical Medicine, Nanhua Affiliated Hospital, University of South China, Hengyang, Hunan Province 421001, People's Republic of China; <sup>4</sup>Institute of Cardiovascular Disease and Key Lab for Arteriosclerosis of Hunan Province, University of South China, Hengyang, Hunan Province 421001, People's Republic of China

**Correspondence:** Zhisheng Jiang (zhishengjiangvip@126.com)

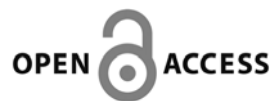

We conducted a meta-analysis to evaluate the effect of probiotic combined with aminosalicyclic on induction remission maintenance treatment of ulcerative colitis (UC). We conducted systematic searches in several Chinese and English databases from inception to June 2018, screening randomized controlled trials about effect of probiotics combined with aminosalicyclic acid on UC. The evaluation indicator was the rate of remission. The relative risk (RR) and 95% confidence interval (CI) were calculated. A total of 27 studies with 1942 patients were included. The results indicated that the remission rate was significantly higher in the group using probiotics combined with aminosalicyclic acid than that in the group using aminosalicyclic acid alone (RR = 1.40, 95% CI: 1.27–1.53,  $P=0.000$ ). The subgroup analysis indicated that probiotics combined with aminosalicyclic acid can significantly elevate the remission rate in both mild to moderate (RR = 1.33, 95% CI: 1.16–1.54,  $P=0.000$ ) and active stage (RR = 1.40, 95% CI: 1.27–1.64,  $P=0.000$ ) UC. In different number of bacterium, drug types and treatment periods, the combination with probiotics can significantly increase the remission rate UC. The funnel plot shows slight publication bias. Probiotics in conjunction with aminosalicyclic can obviously increase the clinical remission rate of activity UC than drug alone. There was no significant difference between combined with mesalazine group and salicylazosulfapyridine group.

## Introduction

Ulcerative colitis (UC) is a chronic intestinal inflammatory disease with increasing prevalence worldwide [1]. Chronic inflammation and colitis in colonic mucosa are the main features of UC. The disease course of UC could be very long and usually accompanied by persistent symptoms. It is quite difficult for UC to be cured [2]. UC affects the life quality of patients. Patients who have longer disease course of UC are more likely to get colon cancer [3]. The etiology and pathogenesis of UC have been extensively studied. Various hypotheses were proposed by different researchers. But until now, none of those hypotheses are perfect. At present, scholars believe that genetic factors, immune factors, intestinal mucosa barrier function factors, environmental factors, and microorganism factors might be related to UC [4]. Since UC is considered as an autoimmune disease, immune factors seem to play an important role in UC [5].

The treatment of UC is mainly anti-inflammation and immune response regulation [6]. In recent years, studies have found that severe intestinal flora imbalances are closely related to the occurrence of UC, so the research and application of microecological agents are getting more and more attention [7–9]. Accumulating evidences have suggested that intestinal microbiota plays an important role in the pathogenesis of this disorder [10,11]. Therefore, increasing clinical trials have been carried out to explore the effects of

Received: 13 June 2018  
Revised: 26 August 2018  
Accepted: 30 August 2018

Accepted Manuscript Online:  
17 September 2018  
Version of Record published:  
18 January 2019

different probiotics in treating UC and suggested that probiotics could have beneficial effects on UC patients. However, many of these studies either have relatively small sample size or are not randomized controlled trials (RCTs). The meta-analysis based on a large data of RCTs could make the evidence more convincing. The present paper summarized the available literature before June 2018, which concerned the probiotic intervention studies for the management of UC, comparing the effects between probiotics and placebo, no additive treatment to standard therapy or mesalazine, addressing the clinical outcome parameters in UC subjects.

## Materials and methods

We followed the Cochrane Handbook for Systematic Reviews of Intervention to conduct this meta-analysis [12]. The results were reported in compliance with the Preferred Reporting Items for Systematic Reviews and Meta-Analysis (PRISMA) [13]. The ethical approval is not applicable to the present study.

### Literature search

We conducted systematical online searches in the PubMed, Web of science, Embase, Wanfang, VIP (VIP Database for Chinese Technical Periodicals), and China National Knowledge Infrastructure database from inception to June 10, 2018. The following search words were used: probiotics, UC, RCTs, induction of remission, aminosalicic acid, mesalazine, and sulfasalazine. We placed language restriction to Chinese and English. We also checked the reference lists of previous reviews to identify potentially eligible studies.

### Criteria for inclusion and exclusion

Two investigators (P.L.J. and Z.Y.) independently carried out the initial search. Any discrepancy was resolved by discussion and consensus. The included study had to meet the following criteria: (1) Population: children or adults with UC regardless of clinical setting. (2) Intervention: probiotics in conjunction with mesalazine or sulfasalazine or aminosalicic acid. (3) Comparison: mesalazine or sulfasalazine or aminosalicic acid alone (4) Primary outcomes: remission rate. The latest data were used for duplicates. The reviews, comments, letters, animal study, or experimental study was excluded. Study with unavailable data were also excluded.

### Data extraction

Two authors independently performed the data extraction using a standard excel sheet. Any disagreements were solved by consensus. For each study, the following information was extracted: the first author, publication year, degree of severity (mild to moderate, active stage), intervention versus comparison, probiotics types and number, doses for probiotics, treatment period (week), trial group (event and non-event), control (event vs non-event) sample size. We also contacted the corresponding authors to obtain the information, if required. We only focused on remission rate of patients with UC in the present study.

### Assessment of quality

We used the Cochrane risk of bias tool to assess the quality of included studies [14]. This evaluation tool consists of random sequence generation, allocation concealment, blinding of participants, personnel-to-study protocol, blinding of outcome assessment, incomplete outcomes data, selective reporting, and other bias. The studies were classified as high risk, low risk, and unclear risk of bias according to the above criteria. The studies with more than one key domains were considered high risk of bias, those without all domains were considered low risk of bias. Otherwise, they were considered to be at unclear risk of bias.

### Statistical analysis

In the present study, the relative risks (RRs) with 95% confidence intervals (CIs) were calculated to quantify the effect of probiotics combined with aminosalicic acid on UC. Heterogeneity within studies was evaluated using  $I^2$  statistic and Chi-square test, the  $I^2 > 50\%$  or  $P < 0.05$  indicated significant heterogeneity [15,16]. The random-effect model was used for heterogeneity. Subgroup analyses were also conducted in the following category: severity (mild to moderate vs active stage), number of probiotics (one type, two types, and three types), type of drug (mesalazine vs salicylazosulfapyridine [SASP]) and treatment period (4, 8, and 12 weeks). Sensitivity analysis was conducted to test the stability of pooled results. Publication bias was assessed by visually inspecting a funnel plot and trim and filled funnel plot, and the Begg and Egger's test was also used [17]. All statistical analyses were completed using Stata 13.0 and RevMan 5.0.  $P < 0.05$  was considered significance.

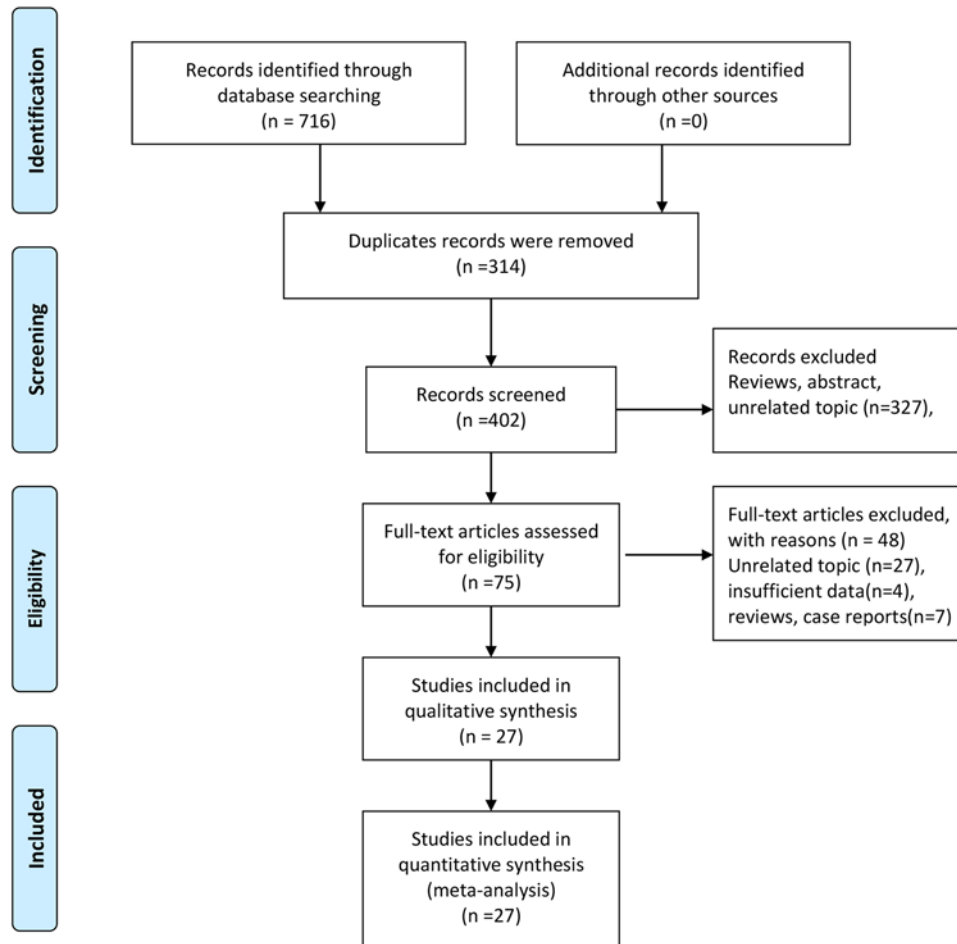

Figure 1. The flow chart of study selection

## Results

### Study selection

The flowchart of study selection was presented in Figure 1. We first obtained 716 records from 6 online databases. After 314 duplicate records were removed, 402 records were prepared for further screening. 327 records were excluded by scanning titles and abstracts. We got 75 records for full-text articles assessed for eligibility. 49 studies were excluded including 28 unrelated topics, 4 studies with insufficient data, 7 reviews, and case reports. Twenty-seven studies were finally included in the qualitative and quantitative synthesis (Supplementary File S1).

### General characteristics of included studies

The general characteristics of included studies were presented in Table 1. These studies were published from 2007 to 2018. The sample sizes ranged from 34 to 129, with a total of 1942 patients. Among these studies, 10 studies were conducted among patients with active stage UC, and 16 studies were conducted in patients with mild-to-moderate UC. For control group, 4 studies used SASP only, and 23 studies used mesalazine only. Twenty studies involved seven types of bacterium, including *Bifidobacterium*, *Lactobacillus*, *Streptococcus thermophilus*, *Enterococcus faecalis*, *Clostridium butyricum*, *Bacillus subtilis*, and *Saccharum*. Nine studies had one type of bacterium, two studies had two types of bacterium, and fifteen studies included three types of bacterium. The treatment period of most studies were 8 weeks, and eight studies were 4 weeks, and three studies were 12 weeks. The remission rate of trial group ranged from 15.4 to 82.9%, and the control group ranged from 7.7 to 71.9%.

**Table 1** Characteristics of included study in the meta-analysis

| Author     | Year | Degree of severity | Control group | Probiotics | Dose/d                 | Treatment period (weeks) | Trial (E/N) |    | Control (E/N) |    | Sample size |
|------------|------|--------------------|---------------|------------|------------------------|--------------------------|-------------|----|---------------|----|-------------|
| Cui [37]   | 2007 | Mild to moderate   | Mesalazine    | 1,2,3      | 1.5 × 10 <sup>7</sup>  | 12                       | 41          | 24 | 46            | 18 | 129         |
| Fan [38]   | 2013 | Active stage       | Mesalazine    | 1,2,4      | 6 × 10 <sup>7</sup>    | 8                        | 15          | 10 | 8             | 17 | 50          |
| Feng [39]  | 2012 | Mild to moderate   | Mesalazine    | 2          | 2 × 10 <sup>11</sup>   | 8                        | 11          | 19 | 9             | 21 | 60          |
| Fu [40]    | 2012 | Mild to moderate   | Mesalazine    | 1,2,4      | 6 × 10 <sup>7</sup>    | 8                        | 19          | 16 | 14            | 21 | 70          |
| Gao [41]   | 2013 | Mild to moderate   | Mesalazine    | 1,2,4      | 6 × 10 <sup>7</sup>    | 4                        | 21          | 29 | 21            | 29 | 100         |
| Huang [42] | 2012 | Mild to moderate   | SASP          | 1,2,4      | 6 × 10 <sup>7</sup>    | 12                       | 19          | 12 | 12            | 19 | 62          |
| Liu [43]   | 2007 | Mild to moderate   | SASP          | 2          | 4.2 × 10 <sup>2</sup>  | 4                        | 34          | 7  | 23            | 17 | 81          |
| Liu [44]   | 2010 | Mild to moderate   | Mesalazine    | 1,2,4      | 6 × 10 <sup>7</sup>    | 4                        | 17          | 13 | 12            | 16 | 58          |
| Luo [45]   | 2008 | Mild to moderate   | Mesalazine    | 1,2,4      | 6 × 10 <sup>7</sup>    | 8                        | 13          | 12 | 9             | 19 | 53          |
| Tu [53]    | 2011 | Mild to moderate   | Mesalazine    | 1,2,4      | 6 × 10 <sup>7</sup>    | 4                        | 15          | 23 | 10            | 28 | 76          |
| Wang [46]  | 2013 | Mild to moderate   | Mesalazine    | 1,2,3      | 3 × 10 <sup>7</sup>    | 4                        | 23          | 10 | 16            | 14 | 63          |
| Wang [47]  | 2013 | Mild to moderate   | Mesalazine    | 1,2,4      | 6 × 10 <sup>7</sup>    | 8                        | 25          | 10 | 19            | 16 | 70          |
| Yu [48]    | 2012 | Active stage       | Mesalazine    | 1,2,4      | 6 × 10 <sup>7</sup>    | 8                        | 16          | 15 | 10            | 21 | 62          |
| Yuan [49]  | 2012 | Active stage       | Mesalazine    | 1,2,4      | 6 × 10 <sup>7</sup>    | 4                        | 12          | 6  | 7             | 11 | 36          |
| Zhang [50] | 2013 | Mild to moderate   | Mesalazine    | 124        | 8 × 10 <sup>7</sup>    | 8                        | 16          | 10 | 8             | 14 | 48          |
| Zhang [51] | 2012 | Active stage       | Mesalazine    | 5          | 3.78 × 10 <sup>7</sup> | 8                        | 26          | 21 | 18            | 29 | 94          |
| Zhou [52]  | 2009 | Mild to moderate   | Mesalazine    | 1,2,4      | 6 × 10 <sup>7</sup>    | 4                        | 9           | 11 | 5             | 9  | 34          |
| Chen [27]  | 2017 | Active stage       | Mesalazine    | 6          | –                      | 8                        | 8           | 26 | 4             | 30 | 68          |
| Liang [28] | 2017 | Active stage       | Mesalazine    | 6          | 0.5 g, TID             | 8                        | 24          | 26 | 19            | 31 | 100         |
| Xu [29]    | 2016 | Active stage       | Mesalazine    | 7          | 0.5 g, BID             | 8                        | 16          | 15 | 11            | 20 | 62          |
| Peng [30]  | 2017 | Active stage       | Mesalazine    | 4          | 0.5 g, TID             | 8                        | 35          | 28 | 24            | 39 | 126         |
| Chen [31]  | 2015 | Active stage       | SASP          | 4,6        | 0.5 g, TID             | 8                        | 4           | 22 | 2             | 24 | 52          |
| Gong [32]  | 2015 | Active stage       | Mesalazine    | 1          | 0.5 g, TID             | 8                        | 28          | 12 | 19            | 21 | 80          |
| Ou [36]    | 2014 | Mild to moderate   | SASP          | 2          | 0.5 g, TID             | 12                       | 28          | 26 | 17            | 37 | 108         |
| Wang [35]  | 2014 | Mild to moderate   | Mesalazine    | 1,2,4      | 0.5 g, TID             | 8                        | 24          | 16 | 14            | 26 | 80          |
| Hua [34]   | 2015 | Mild to moderate   | Mesalazine    | 1,2,3      | 0.5 g, TID             | 4                        | 21          | 11 | 13            | 19 | 64          |
| Zhang [33] | 2015 | Mild to moderate   | Mesalazine    | 1,2,3      | 0.5 g, TID             | 8                        | 15          | 15 | 6             | 20 | 56          |

\*E, event; N, non-event; 1, Bifidobacterium; 2, Lactobacillus; 3, Streptococcus thermophilus; 4, Enterococcus faecalis; 5, Clostridium butyricum; 6, Bacillus subtilis; 7, Saccharum. TID, three times per day; BID, twice per day.

## Assessment of quality

The Supplementary Figures S2 and S3 presented the details of risk of bias. Overall, 12 studies were categorized as being at high risk, and the rest of studies were unclear risk of bias. The primary reason is the blinding of participants and personnel (performance bias). These studies did not report whether blinding method was used. The random sequence generation was perfect in all studies.

## Pooled results

Twenty-seven studies totaling 1942 provided data on remission rate. Compared with aminosalicyclic acid alone, the combination with probiotics significantly increased remission rate (RR = 1.40, 95% CI: 1.27–1.53, P=0.000, Figure 2)

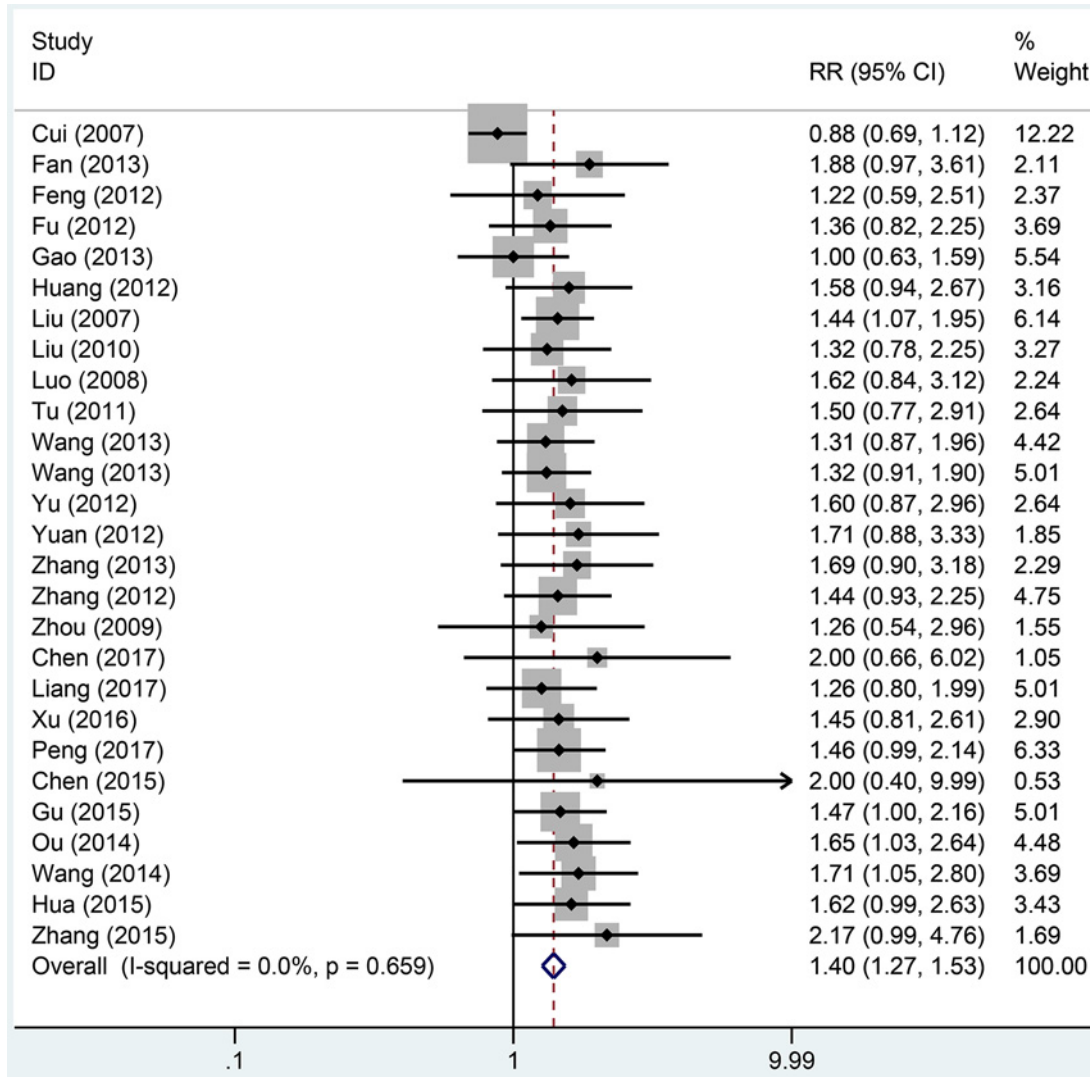

Figure 2. Forest plot of effect of probiotics combined with aminosalicylic acid on UC

without heterogeneity ( $I^2=0.0\%$ ,  $P=0.659$ ). The subgroup analysis indicated that probiotics combined with aminosalicylic acid can significantly elevate the remission rate in both mild to moderate ( $RR = 1.33$ , 95% CI: 1.16–1.54,  $P=0.000$ , Figure 3A) and active stage ( $RR = 1.40$ , 95% CI: 1.27–1.64,  $P=0.000$ , Figure 3B) UC. One and three types showed that combination with probiotics can affiliate the remission of UC ( $RR = 1.36$ , 95% CI: 1.20–1.53,  $P=0.000$ ;  $RR = 1.45$ , 95% CI: 1.24–1.70,  $P=0.000$ , Figure 4). There was no significance for two types of bacterium between the trial and control group ( $RR = 1.54$ , 95% CI: 0.88–2.69,  $P=0.130$ , Figure 4). For different mesalazine or SASP, the combination was still better than drug only. Significant differences were found in both types of drug (Figure 5,  $RR = 1.37$ , 95% CI: 1.23–1.52,  $P=0.000$  vs  $RR = 1.56$ , 95% CI: 1.23–1.98,  $P=0.000$ ). We also conducted subgroup analysis in different treatment periods, the results from fixed-effect model indicated that significant remission rate differences were found (8 weeks:  $RR = 1.51$ , 95% CI: 1.32–1.73,  $P=0.000$ ; 4 weeks:  $RR = 1.36$ , 95% CI: 1.14–1.61,  $P=0.001$ , Figure 6). For 12 weeks, there were no significant differences ( $RR = 1.16$ , 95% CI: 0.95–1.43, Figure 6).

## Sensitivity analysis

The sensitivity analysis was conducted by excluding one study each time and pooled the rest studies. The results indicated that no significant alteration was found (Supplementary Figure S4), which showed that the pooled results were stable.



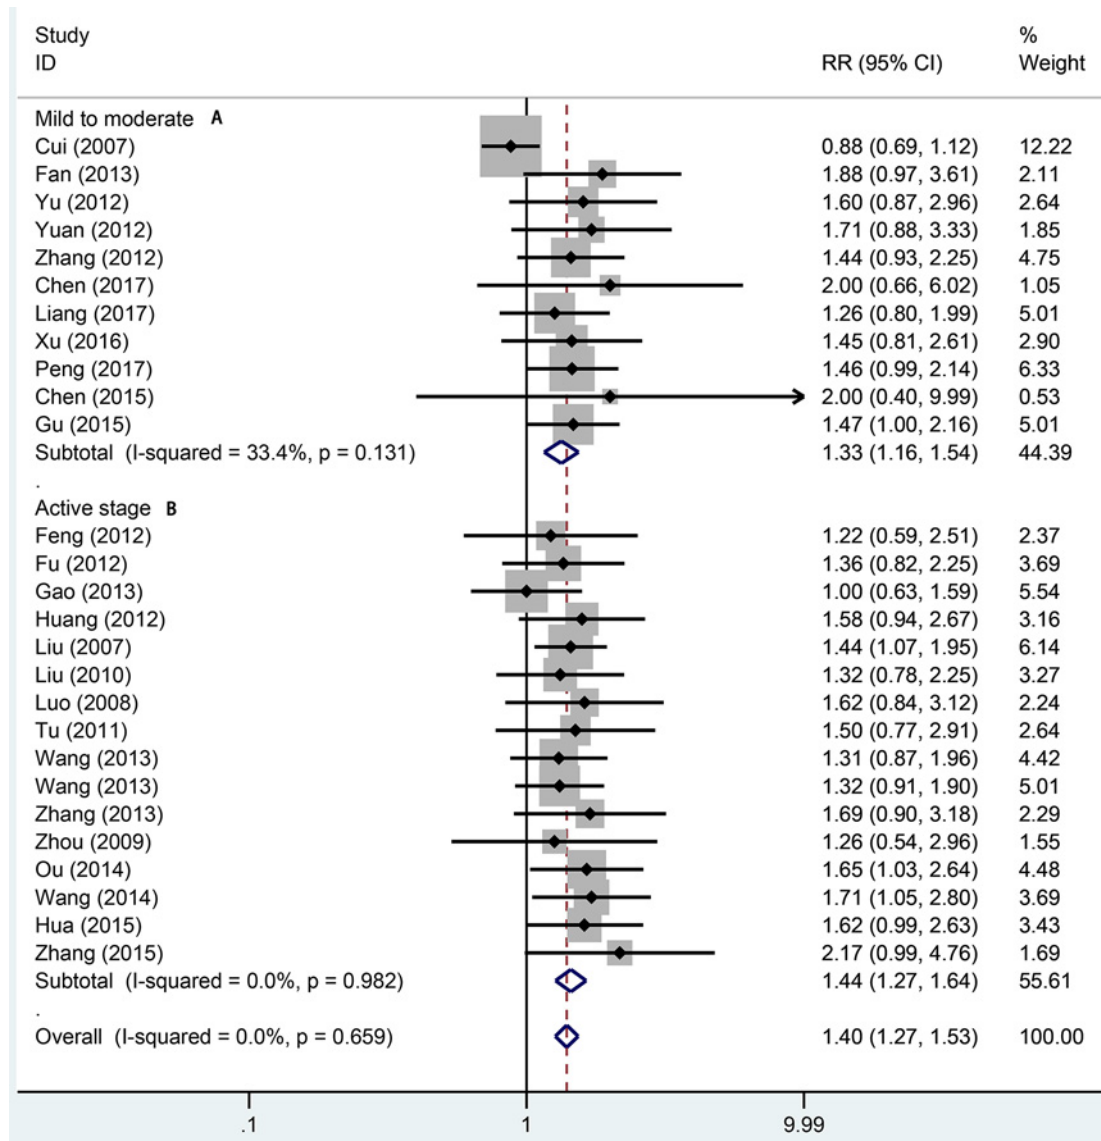

**Figure 3. Forest plot of effect of probiotics combined with aminosalicic acid on different stage of UC**  
 A, mild to moderate; B, active stage.

### Publication bias

The funnel plot was presented in Figure 7. There was a slight asymmetry in the funnel plot, which means publication bias may exist. The Begg and Egger's test indicated that some publication bias existed ( $Z=2.000$ ,  $P=0.045$ ,  $t=7.050$ ,  $P=0.000$ ). We also used the trim and filled funnel plot to assess the publication bias. Eleven studies were needed to make the funnel plot balance (Supplementary Figure S5).

### Discussion

The present study comprehensively and systematically reviewed the current available literature and found that: (1) probiotics in conjunction with aminosalicic acid can significantly increase the remission rate of UC compared with aminosalicic acid alone. There was no significant difference between combined with mesalazine group and SASP group. (2) The results remained consistent in different number of bacterium, severity of UC, type of combined drug, and treatment periods (4 vs 8 weeks). (3) For a 12-week treatment, no significant effect difference was found between drug combination and single drug.

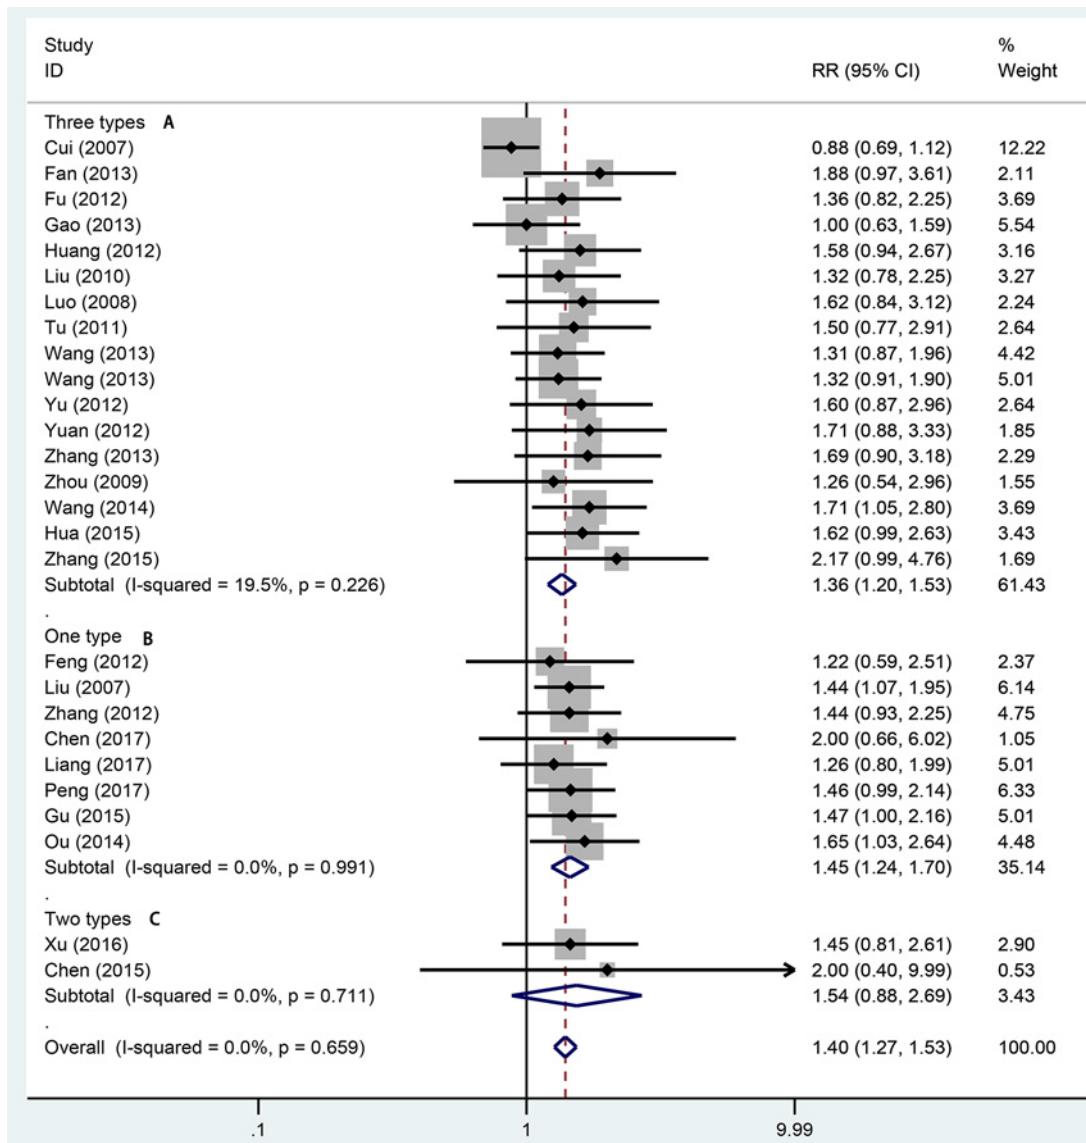

**Figure 4.** Forest plot of effect of probiotics combined with aminosalicylic acid on UC in different number of protiotics  
 A: three types; B: one type; C: two types.

The pathological and physiological mechanism of UC was complicated, including at least four interacting factors: gene, immune system, intestinal flora, and environment [18]. Compared with normal healthy people, the intestinal flora of most patients with UC had changed. It was reported that the intestinal flora had changed regardless of active period or the relieved period for patients with UC [19]. The number of *Pseudomonas*, *Bifidobacterium*, *Helicobacter spiralis*, *Fragile pseudomonas*, and *Clostridium difficile* had decreased while the number of Enterococcus and Bacillus increased. Therefore, it is theoretically possible to alleviate the active period of UC by correcting the imbalance of bacterial flora through probiotics [20]. The possible mechanisms of probiotics in the treatment of UC included inhibiting the growth pathogenic bacteria, improving the function of epithelial mucosal barrier, regulating immunity, and reducing the secretion of proinflammatory factors. Previous studies evaluated the maintenance effect of probiotics versus that of aminosalicylates on UC. A meta-analysis with six RCTs and a total of 721 participants indicated that no significant difference was observed between probiotics and aminosalicylate (RR = 1.08, 95% CI: 0.91–1.28). However, the number of this meta-analysis was limited [21]. Sang et al. [22] evaluated the induction of remission and maintenance effect of probiotics of UC. Compared with the non-probiotics group, the remission rate for UC patients who received probiotics was not significantly altered (RR = 1.35, 95% CI: 0.98–1.85). Nevertheless, the remission rate

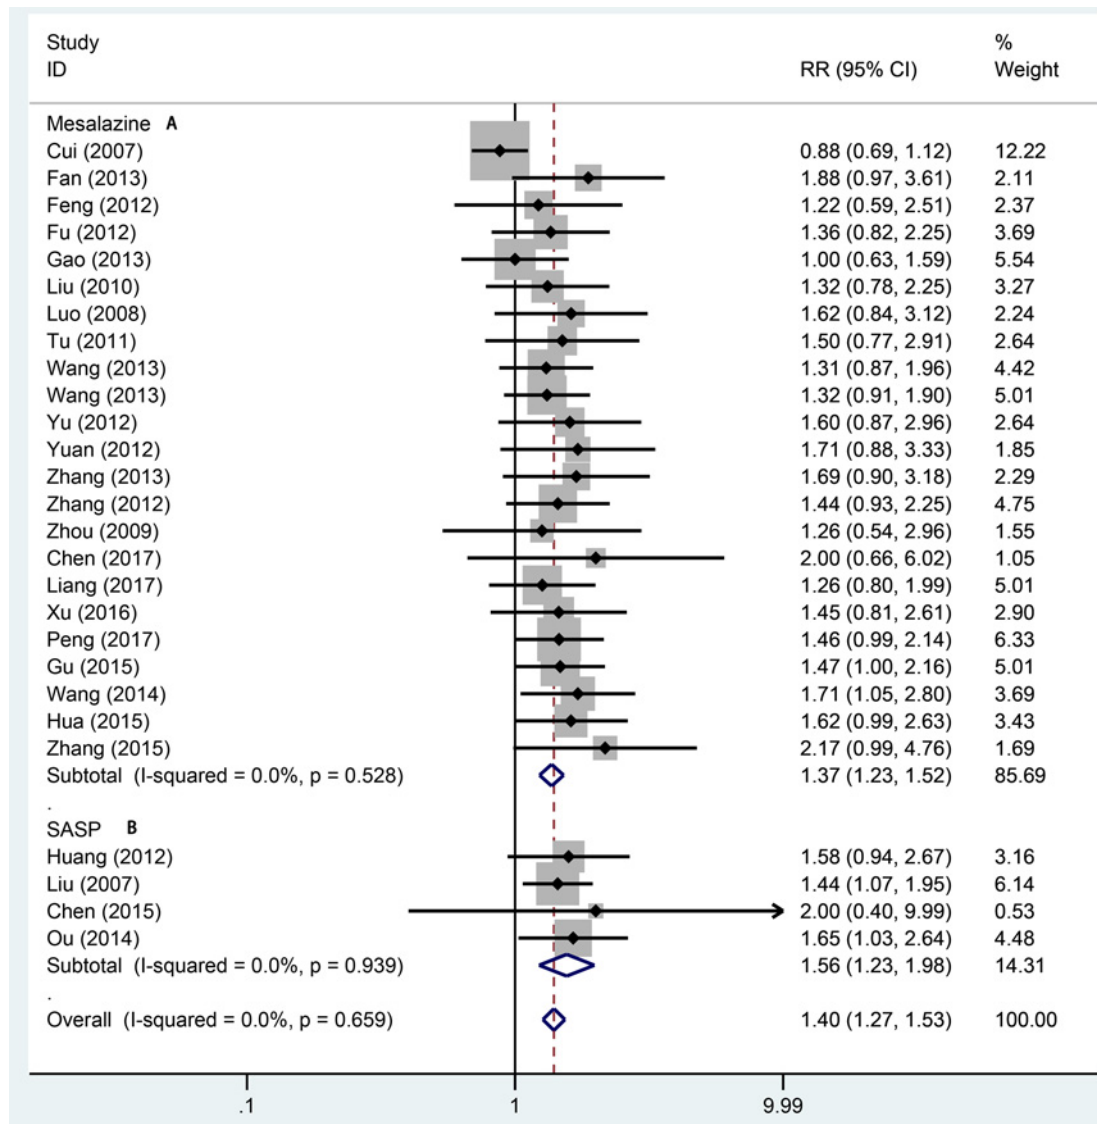

**Figure 5. Forest plot of effect of probiotics combined with different aminosalicic acid on UC**

A: mesalazine; B: SASP.

of UC which received probiotics was increased (RR = 2.00, 95% CI: 1.35–2.96). Another study with 23 RCTs and a total of 1763 patients evaluated whether probiotics were beneficial at all stages of the treatment in inflammatory bowel disease or superior to placebo. They found that probiotics can significantly increase the remission rate in patients with active UC ( $P=0.010$ ) compared with placebo group. Unfortunately, similar effect on maintaining remission rate of UC was found between probiotics and 5-aminosalicylic acid [23]. These studies suggested that probiotic treatment was more effective than placebo in maintaining remission of UC and was equivalent compared with aminosalicic acid.

In the past several years, more and more researchers have focused on combined drugs.

Previous studies indicated that the maintaining effect of probiotics for active stage UC was unclear, and the induction remission of aminosalicic acid was obvious [24]. Whether patients with UC can benefit a lot from combination of probiotics with aminosalicic acid still remains unclear. Currently, the aminosalicic acid agents are commonly used in the treatment of UC, including SASP and mesalazine. Patients with UC tended to use large amounts of antibiotics for a long time [25]. The number of normal bacteria in the intestinal tract is reduced. The SASP was decomposed into 5-aminosalicylic acid by bacteria. The effect of aminosalicic acid greatly decreased. At the same time, SASP itself has a certain bacteriostatic effect, and also inhibited the intestinal bacteria decomposition of SASP [26]. Both of



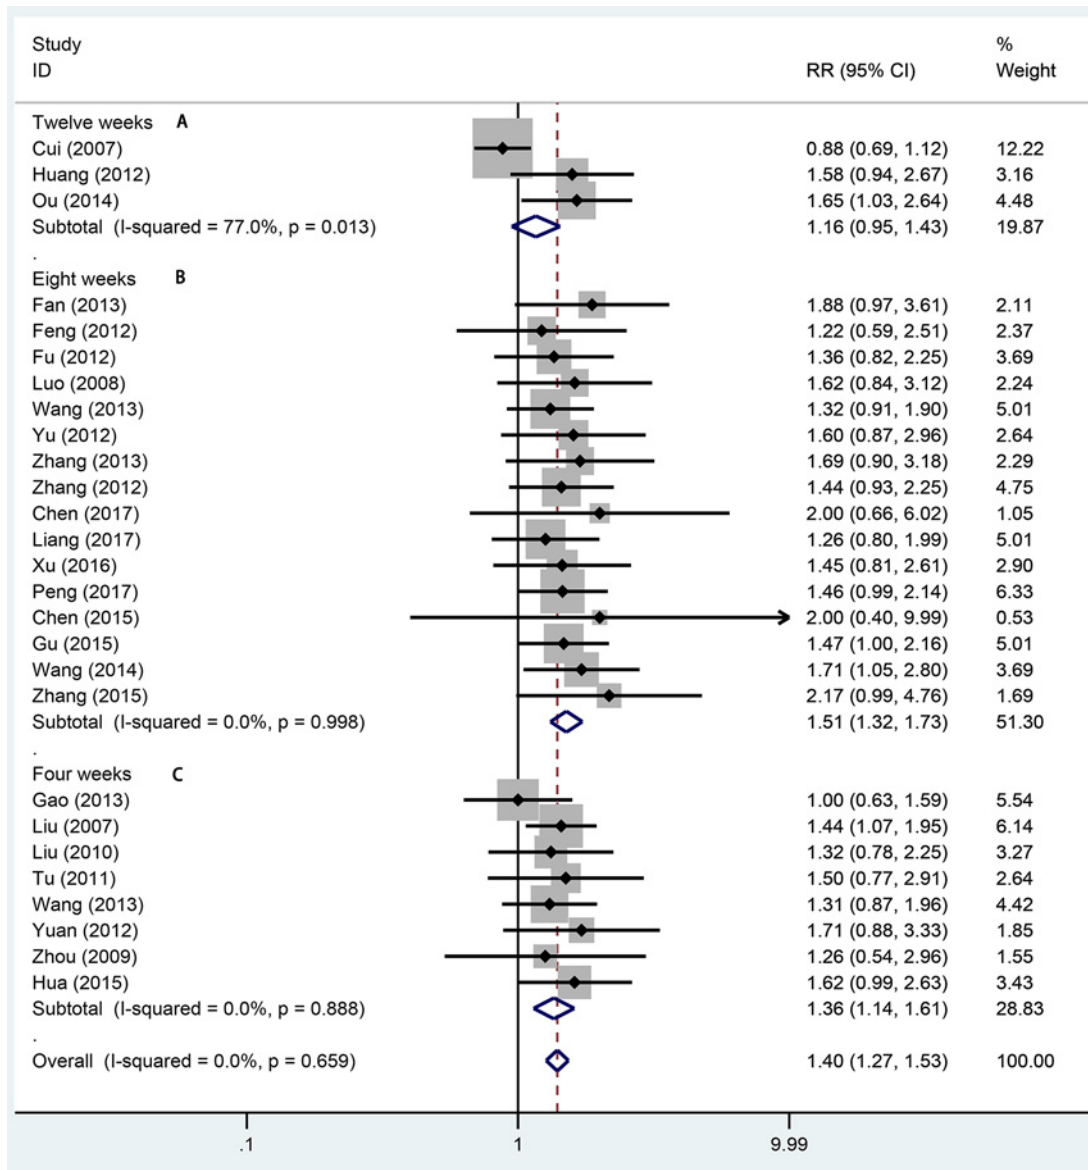

**Figure 6.** Forest plot of effect of probiotics combined with aminosalicylic acid on UC in different treatment period  
 A: 12 weeks; B: 8 weeks; C: 4 weeks.

the two reasons lowered the concentration of 5-aminosalicylic acid, which makes the therapy effect not ideal. Therefore, if probiotics was used when aminosalicylic acid was taken, this plan can regulate the intestinal flora and increase the concentration of 5-aminopylic acid and improve the curative effect. The present study confirmed this theory and gave a stronger evidence.

The main strengthen of the present study is that we did not find any significant heterogeneity within studies. The present study still has several limitations. First, the quality of included study was moderate, and the primary reason was the lack of blinding methods. Second, a number of included studies are few in some subgroup settings, and more rigorous and well-designed RCTs are needed to confirm our results. Third, most of the studies are from Asian populations that may cause publication bias. In fact, the funnel plot, Begg and Egger's test also indicated that there was a slight publication bias, which may influence the stability of pooled results. Finally, although we carefully selected published studies, some unpublished data and grey literature were not included, which may influence the estimation.

In conclusion, our meta-analysis suggested that probiotics in conjunction with aminosalicylic can obviously increase the clinical remission rate of activity UC than drug alone. This effect was not influenced by probiotic types,

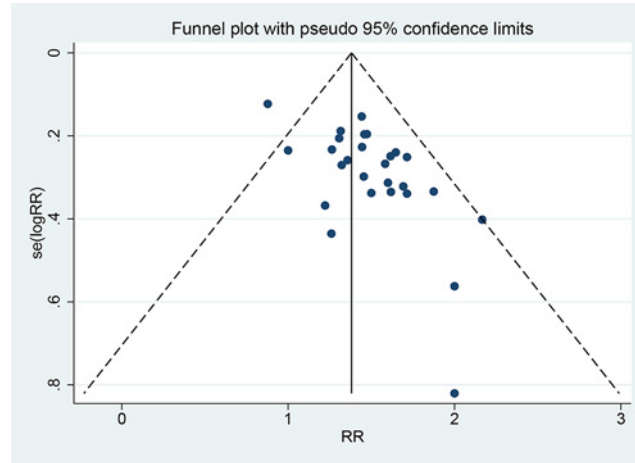

**Figure 7. Funnel plot of publication bias**

severity of disease, and type of drugs. After a 12-week treatment, no significant difference was observed between combined and single drugs. This result from subgroup analysis should be cautious because of the limited number of studies.

### Acknowledgments

We thank the colleagues of the Pediatric Academy of University of South China.

### Author contribution

P.L.J. and J.Z.S. conceived and designed the research. Z.Y. and W.A.P. analyzed the data. P.L.J. and J.Z.S. created all tables and figures. P.L.J. drafted the manuscript. Z.Y. and W.A.P. made critical revisions of the manuscript. All authors read and approved the final manuscript.

### Funding

The authors declare that there are no sources of funding to be acknowledged.

### Competing interests

The authors declare that there are no competing interests associated with the manuscript.

### Abbreviations

CI, confidence interval; PRISMA, preferred reporting items for systematic reviews and meta-analysis; RCT, randomized controlled trial; RR, relative risk; SASP, salicylazosulfapyridine; UC, ulcerative colitis.

### References

- Limdi, J.K. and Farraye, F.A. (2018) An update on surveillance in ulcerative colitis. *Curr. Gastroenterol. Rep.* **20**, 7, <https://doi.org/10.1007/s11894-018-0612-2>
- Ryan, D.P. and Doody, D.P. (2017) Surgical options in the treatment of ulcerative colitis. *Semin. Pediatr. Surg.* **26**, 379–383, <https://doi.org/10.1053/j.sempedsurg.2017.10.001>
- Kaplan, G.G. (2017) Colon cancer in Asian patients with ulcerative colitis. *Lancet Gastroenterol. Hepatol.* **2**, 238–239, [https://doi.org/10.1016/S2468-1253\(17\)30032-8](https://doi.org/10.1016/S2468-1253(17)30032-8)
- Hanauer, S.B. (2004) Update on the etiology, pathogenesis and diagnosis of ulcerative colitis. *Nat. Clin. Pract. Gastroenterol. Hepatol.* **1**, 26–31, <https://doi.org/10.1038/ncpgasthep0031>
- Casella, G., Antonelli, E., Villanacci, V., Salemm, M., Di Bella, C., Baldini, V. et al. (2016) Immune thrombocytopenia in ulcerative colitis. *Tech. Coloproctol.* **20**, 499–500, <https://doi.org/10.1007/s10151-016-1471-1>
- Holubar, S.D. (2018) Prevention, diagnosis, and treatment of complications of the IPAA for ulcerative colitis. *Dis. Colon Rectum.* **61**, 532–536, <https://doi.org/10.1097/DCR.0000000000001094>
- Yao, P., Cui, M., Wang, H., Gao, H., Wang, L., Yang, T. et al. (2016) Quantitative analysis of intestinal flora of uygur and han ethnic chinese patients with ulcerative colitis. *Gastroenterol Res. Pract.* **2016**, 9186232, <https://doi.org/10.1155/2016/9186232>

- 8 Wang, X.M., Lu, Y., Wu, L.Y., Yu, S.G., Zhao, B.X., Hu, H.Y. et al. (2012) Moxibustion inhibits interleukin-12 and tumor necrosis factor alpha and modulates intestinal flora in rat with ulcerative colitis. *World J. Gastroenterol.* **18**, 6819–6828, <https://doi.org/10.3748/wjg.v18.i46.6819>
- 9 Huang, G., Ye, L., Du, G., Huang, Y., Wu, Y., Ge, S. et al. (2017) Effects of curcumin plus Soy oligosaccharides on intestinal flora of rats with ulcerative colitis. *Cell. Mol. Biol.* **63**, 20–25, <https://doi.org/10.14715/cmb/2017.63.7.3>
- 10 Shen, Z.H., Zhu, C.X., Quan, Y.S., Yang, Z.Y., Wu, S., Luo, W.W. et al. (2018) Relationship between intestinal microbiota and ulcerative colitis: mechanisms and clinical application of probiotics and fecal microbiota transplantation. *World J. Gastroenterol.* **24**, 5–14, <https://doi.org/10.3748/wjg.v24.i1.5>
- 11 Ohkusa, T. and Koido, S. (2015) Intestinal microbiota and ulcerative colitis. *J. Infect. Chemother.* **21**, 761–768, <https://doi.org/10.1016/j.jiac.2015.07.010>
- 12 Higgins, J. and Green, S. (2011) Cochrane handbook for systematic reviews of interventions, version 5.1.0.. *The Cochrane Collaboration*, (date of access: June 10, 2018)
- 13 Moher, D., Liberati, A., Tetzlaff, J. and Altman, D.G. (2010) Preferred reporting items for systematic reviews and meta-analyses: the PRISMA statement. *Int. J. Surg.* **8**, 336–341, <https://doi.org/10.1016/j.ijsu.2010.02.007>
- 14 Higgins, J.P., Altman, D.G., Gotzsche, P.C., Juni, P., Moher, D., Oxman, A.D. et al. (2011) The Cochrane Collaboration's tool for assessing risk of bias in randomised trials. *BMJ* **343**, d5928, <https://doi.org/10.1136/bmj.d5928>
- 15 Higgins, J.P., Thompson, S.G., Deeks, J.J. and Altman, D.G. (2003) Measuring inconsistency in meta-analyses. *BMJ* **327**, 557–560, <https://doi.org/10.1136/bmj.327.7414.557>
- 16 Higgins, J.P. and Thompson, S.G. (2002) Quantifying heterogeneity in a meta-analysis. *Stat. Med.* **21**, 1539–1558, <https://doi.org/10.1002/sim.1186>
- 17 Egger, M., Davey, S.G., Schneider, M. and Minder, C. (1997) Bias in meta-analysis detected by a simple, graphical test. *BMJ* **315**, 629–634, <https://doi.org/10.1136/bmj.315.7109.629>
- 18 Gentschew, L. and Ferguson, L.R. (2012) Role of nutrition and microbiota in susceptibility to inflammatory bowel diseases. *Mol. Nutr. Food Res.* **56**, 524–535, <https://doi.org/10.1002/mnfr.201100630>
- 19 Sha, S., Xu, B., Wang, X., Zhang, Y., Wang, H., Kong, X. et al. (2013) The biodiversity and composition of the dominant fecal microbiota in patients with inflammatory bowel disease. *Diagn. Microbiol. Infect. Dis.* **75**, 245–251, <https://doi.org/10.1016/j.diagmicrobio.2012.11.022>
- 20 Ahrne, S. and Hagslatt, M.L. (2011) Effect of lactobacilli on paracellular permeability in the gut. *Nutrients* **3**, 104–117, <https://doi.org/10.3390/nu3010104>
- 21 Jiang, Y., Zhang, Z.G., Qi, F.X., Zhang, Y. and Han, T. (2016) Comparison of maintenance effect of probiotics and aminosaliclates on ulcerative colitis: a meta-analysis of randomized controlled trials. *Chronic Dis. Transl. Med.* **2**, 34–41, <https://doi.org/10.1016/j.cdtm.2016.07.002>
- 22 Sang, L.X., Chang, B., Zhang, W.L., Wu, X.M., Li, X.H. and Jiang, M. (2010) Remission induction and maintenance effect of probiotics on ulcerative colitis: a meta-analysis. *World J. Gastroenterol.* **16**, 1908–1915, <https://doi.org/10.3748/wjg.v16.i15.1908>
- 23 Shen, J., Zuo, Z.X. and Mao, A.P. (2014) Effect of probiotics on inducing remission and maintaining therapy in ulcerative colitis, Crohn's disease, and pouchitis: meta-analysis of randomized controlled trials. *Inflamm. Bowel Dis.* **20**, 21–35, <https://doi.org/10.1097/O1.MIB.0000437495.30052.be>
- 24 Derikx, L.A., Dieleman, L.A. and Hoentjen, F. (2016) Probiotics and prebiotics in ulcerative colitis. *Best Pract. Res. Clin. Gastroenterol.* **30**, 55–71, <https://doi.org/10.1016/j.bpg.2016.02.005>
- 25 Zhu, Y., Tang, R.K., Zhao, P., Zhu, S.S., Li, Y.G. and Li, J.B. (2012) Can oral 5-aminosalicylic acid be administered once daily in the treatment of mild-to-moderate ulcerative colitis? A meta-analysis of randomized-controlled trials. *Eur. J. Gastroenterol. Hepatol.* **24**, 487–494, <https://doi.org/10.1097/MEG.0b013e328350fc81>
- 26 Ford, A.C., Khan, K.J., Achkar, J.P. and Moayyedi, P. (2012) Effect of oral vs. topical, or combined oral and topical 5-aminosalicylates, in ulcerative colitis: systematic review and meta-analysis. *Am. J. Gastroenterol.* **107**, 167–176, <https://doi.org/10.1038/ajg.2011.410>
- 27 Xuan-xuan, C, Yong, Z and Xiang-nong, X (2017) Efficacy and safety of probiotics combined with mesalazine in the treatment of ulcerative colitis. *J. Hunan. Normal Univ. (Med. Sci.)* **14**, 43–45
- 28 Liang, JS (2017) The efficacy of probiotics adjuvant therapy on IL-23/IL-17 inflammatory axis in patients with ulcerative colitis. *Lab. Med. Clin.* **14**, 1434-1435, 1438
- 29 Xu, YC, Feng, QQ, Li, CA and Xin, J (2016) Mesalazine Combined with Probiotics for Ulcerative Colitis. *J. Nanchang. Univ. (Med. Sci.)* **56**, 47–49
- 30 Peng, Q (2017) Clinical value of mesalazine Combined with Probiotics for Ulcerative Colitis. *Haixia Med.* **29**, 160–161
- 31 Chen, LH, Chen, ML, Wu, FB, W, WJ and Xie, NN (2015) Clinical efficacy of probiotics combined with sulfasalazine in the treatment of ulcerative colitis. *Hainan Med.* **26**, 970–972
- 32 Gong, YY, Wang, YL and Sun, Y (2015) Effect of probiotics on mild to moderate ulcerative colitis during active stage. *Chin. Health Nutr.* **9**, 102–103
- 33 Zhang, YF, Zhang, M, Cui, SS and Zhang, RJ (2015) Probiotics in treatment of mild - moderate ulcerative colitis efficacy. *Taishan Med. Univ.* **36**, 604–607
- 34 Hua, HW (2015) Clinical Observation of Mesalazine Combined with Probiotics in Treatment of Ulcerative Colitis. *Guangdong Trace Elem. Sci.* **22**, 47–50
- 35 Wang, YZ (2014) Analysis on the role of probiotics in ulcerative colitis. *Heilongjiang Med.* **38**, 559
- 36 Ou, XE and Wan, CR (2014) Clinical analysis of selecting probiotics in treatment of ulcerative colitis. *J. Qiqihar Univ. Med.* **35**, 2986–2987
- 37 Cui, J, Xu, G and Liu, ZJ (2007) Effect if oribuitucs drug treatment of mild and moderate ulcerative colitis. *Med. Froum.* **28**, 52–54
- 38 Fan, WH (2013) The effect of combined therapy of mesalazine and probiotics in the treatment of ulcerative colitis. *Med. Clin. Prac.* **75**–76
- 39 Feng, YM, Yu, GH, Cheng, SW, Yu, J and Wang, Z (2012) Effect of probiotics on the curative effect of ulcerative colitis. *Clini. Lab. Med.* **11**, 1527–1528
- 40 Fu, XJ (2012) Clinical efficacy of combing probiotic with mesalazine in the treatment of ulcerative colitis. *China Health Industry* **12**, 17
- 41 Gao, S (2013) Comparative observation on the clinical efficacy of ulcerative colitis. *Chin. Foreign Med. Res.* **11**, 29–30
- 42 Huang, L (2012) Curative effect of the combined treatment with probiotics and sulfasalazine for ulcerative colitis. *Sichuan Med.* **33**, 766–768

- 43 Jian-sheng, L, Yi, T, Xiao-hong, Z, Jin, L, Ming, MA, Yao-zong, Y and Jian, L (2007) The levels of nitric oxide and superoxide dismutase in serum and intestine mucosal of ulcerative colitis and the influencing of probiotics agents to them. *Chin. J. Postgrad Med.* **30**, 20–22
- 44 Liu, Y and Tan, RM (2010) Clinical observation of probiotics combined with mesalazine in the treatment of ulcerative colitis. *Jilin Med.* **21**, 2228–2230
- 45 Luo, Y (2008) Study on the clinical effects of mesalazine combined with probiotics in patients with ulcerative colitis. *Shandong Univ.*
- 46 Wang, HY (2013) Efficacy of mesalazine combined with probiotics in the treatment of mild to moderate ulcerative colitis. *Shanxi Med.* **42**, 921–922
- 47 Wang, R, Xu, HM and Zhang, BH (2013) The combined application of methalazine and intestinal probiotics in the treatment of ulcerative colitis. *J. Qiqihar. Univ. Med.* **34**, 2547–2548
- 48 Yu, F and Xu, B (2012) Analysis on the effect of mesalazine combined with probiotics in the treatment of ulcerative colitis. *Seek Med & Ask Med.* **10**, 189
- 49 Yuan, H (2012) Efficacy of probiotics combined with misalazine in the treatment of ulcerative colitis. *Chin. Med. Guide* **5**, 483–484
- 50 Zhang, HM (2013) Efficacy and mechanism of probiotics in the treatment of ulcerative colitis. *Chin. Modern Doct.* **51**, 139–141
- 51 Zhang, ZH (2012) Clinical observation on the treatment of ulcerative colitis with clostridium casein capsule combined with methadine. *J. Changzhi Med. College* **26**, 107–108
- 52 Zhou, XJ (2009) The therapeutic effect of probiotics combined with mesalazine on ulcerative colitis was observed. *J. Jiangsu. Univ.* **19**, 354–356
- 53 Tu, ZY, Li, YM and Xu, W (2011) Mesalazine combined with probiotic for ulcerative colitis: An effect observation of 38 cases. *Chin. Modern. Doct.* **49**, 91–92
